# Supplementary material for: Non-bioenergetic roles of mitochondrial GPD2 promote tumor progression
Source: PubMed Central journal article supplement (PMC9830446; doi:10.7150/thno.75973), 2023-01-01
Supplement: thnov13p0438s1.pdf [file thnov13p0438s1.pdf]

# 1 Non-bioenergetic roles of mitochondrial GPD2 2 promote tumor progression 3

4 Sehyun Oh<sup>1</sup>, Sihyang Jo<sup>1</sup>, Martina Bajzikova<sup>2</sup>, Han Sun Kim<sup>1</sup>, Thien T. P.  
5 Dao<sup>1</sup>, Jakub Rohlena<sup>4</sup>, Jin-Mo Kim<sup>1</sup>, Jiri Neuzil<sup>\*,2,4,5</sup>, Sunghyouk Park<sup>\*,1</sup>  
6

7 <sup>1</sup>College of Pharmacy, Natural Product Research Institute, Seoul National University, Seoul 08826, Korea

8 <sup>2</sup>School of Pharmacy and Medical Science, Griffith University, Southport, Qld, Australia

9 <sup>3</sup>Institute of Physiology, Czech Academy of Sciences, Prague, Czech Republic

10 <sup>4</sup>Institute of Biotechnology, Czech Academy of Sciences, Prague-West, Czech Republic

11 <sup>5</sup>Faculty of Science, Charles University, Prague, Czech Republic  
12

13 \*Corresponding Authors

14 **Sunghyouk Park**

15 Natural Product Research Institute, College of Pharmacy, Seoul National University, Gwanak-Ro 1, Gwanak-gu,  
16 Seoul 08826, Republic of Korea, Tel: +82-2-880-7831; Fax: +82-2-880-7831; E-mail: [psh@snu.ac.kr](mailto:psh@snu.ac.kr)

17 **Jiri Neuzil**

18 School of Pharmacy and Medical Science, Griffith University, 1 Parklands Dr, Southport, Qld 4215, Australia,  
19 Tel: +61-(0)7-5552-9109; Fax: +61-(0)7-5552-9109; E-mail: [j.neuzil@griffith.edu.au](mailto:j.neuzil@griffith.edu.au) or [jiri.neuzil@ibt.cas.cz](mailto:jiri.neuzil@ibt.cas.cz)  
20

21 **Supplementary Information**

22

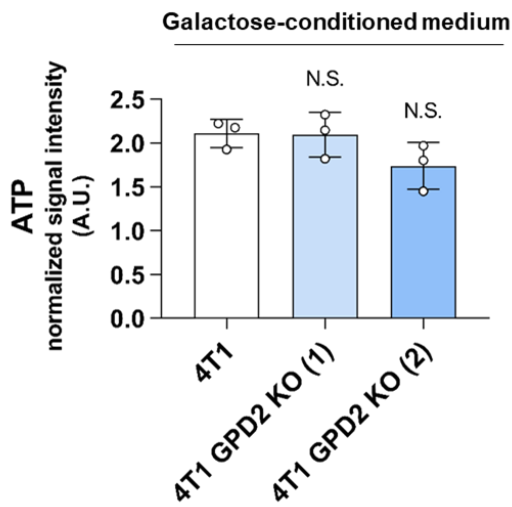

23 **Supplementary Figure 1: ATP level of 4T1 and 4T1 GPD2 KO cells grown in**  
24 **galactose-conditioned medium.** The signal intensity was obtained by LC-MS and  
25 normalized by BCA value. Data were obtained from three biologically independent  
26 samples. The p-value was calculated by comparing the experimental group with 4T1  
27 control group with two-tailed unpaired Student's t-test. The "\*" in the graphs indicates  
28 statistically significant difference ("\*":  $p < 0.05$ ; "\*\*\*":  $p < 0.005$ ; "\*\*\*\*":  $p < 0.0005$ ), and  
29 "N.S.," 'not significant.' A.U., arbitrary unit

30

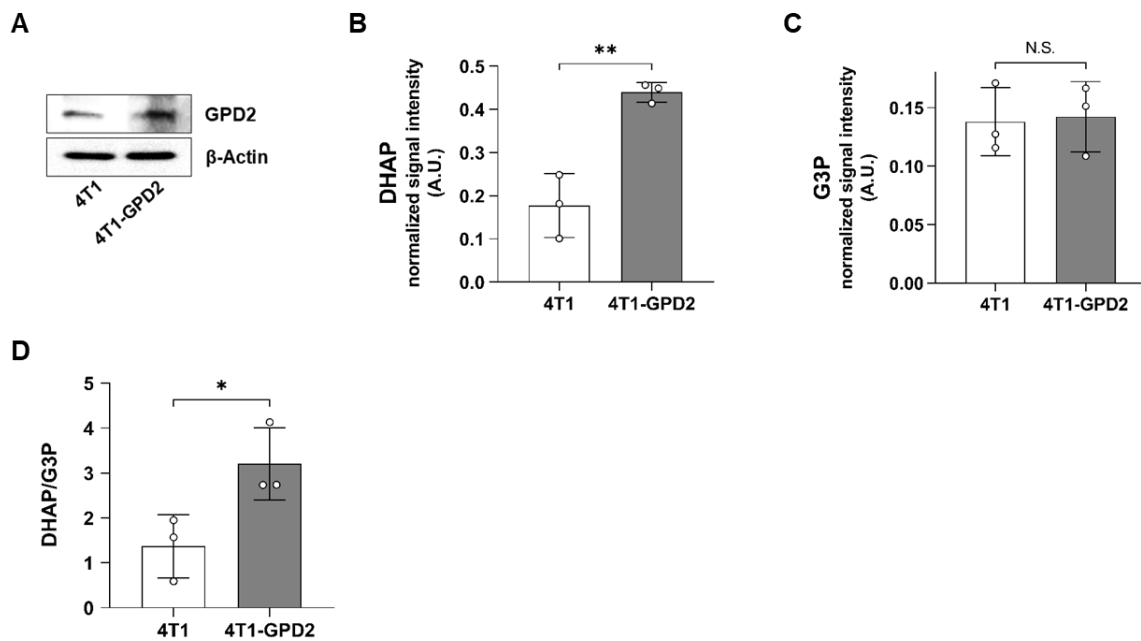

31 **Supplementary Figure 2: DHAP/G3P ratio in 4T1 cells with GPD2**  
 32 **overexpression. (A)** Protein expression of GPD2 in 4T1 and 4T1-GPD2 (GPD2  
 33 overexpression) cells as detected by Western blot analysis. **(B)** Level of DHAP in  
 34 4T1 and 4T1-GPD2 cells. **(C)** Level of G3P in 4T1 and 4T1-GPD2 cells. **(D)** Cellular  
 35 DHAP/G3P ratio in 4T1 and 4T1-GPD2 cells.  
 36 In data (B-D), the signal intensities were obtained by LC-MS and normalized by BCA  
 37 value. Data were obtained from three biologically independent samples. The p-value  
 38 was calculated by comparing the experimental group with 4T1 control group with two-  
 39 tailed unpaired Student's t-test. The "\*" in the graphs indicates statistically significant  
 40 difference ("\*":  $p < 0.05$ ; "\*\*\*":  $p < 0.005$ ; "\*\*\*\*":  $p < 0.0005$ ), and "N.S.," 'not significant.'  
 41 A.U., arbitrary unit  
 42

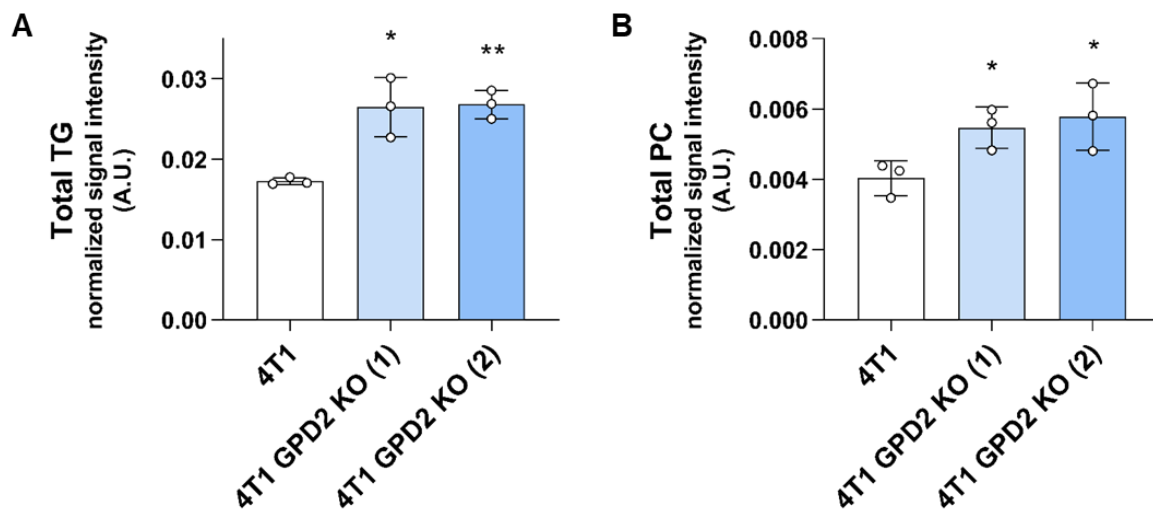

43 **Supplementary Figure 3: Level of total TG and PC in 4T1 and 4T1 GPD2 KO**  
 44 **cells. (A)** TG level in 4T1 and 4T1 GPD2 KO cells. **(B)** PC level in 4T1 and 4T1  
 45 GPD2 KO cells. The signal intensities were obtained by NMR and normalized by  
 46 BCA value.

47 Data were obtained from three biologically independent samples. The p-value was  
 48 calculated by comparing the experimental group with 4T1 control group with two-tailed  
 49 unpaired Student's t-test. The "\*" in the graphs indicates statistically significant  
 50 difference ("\*":  $p < 0.05$ ; "\*\*":  $p < 0.005$ ; "\*\*\*\*":  $p < 0.0005$ ). A.U., arbitrary unit

51

A

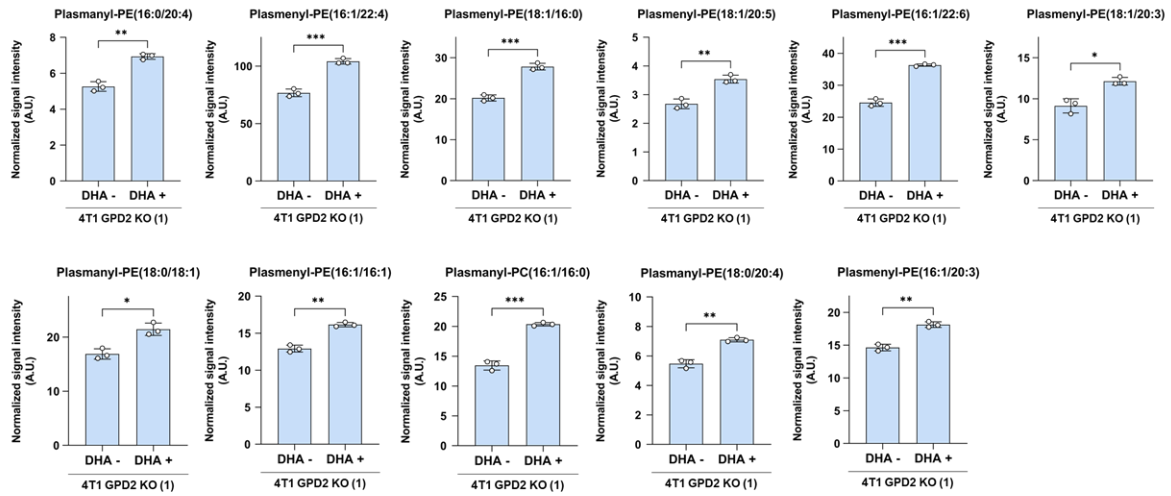

B

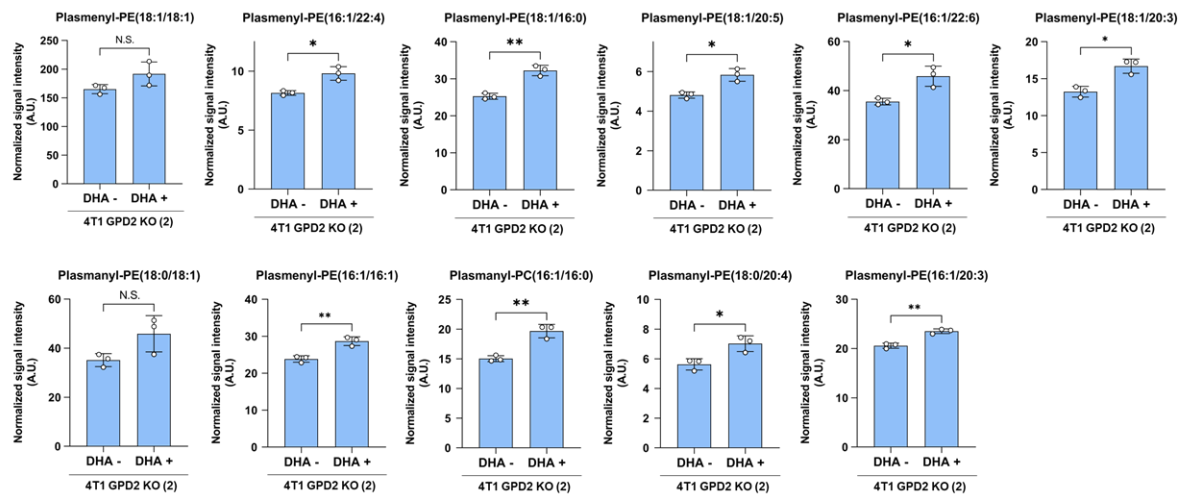53 **Supplementary Figure 4: Levels of different ether lipid species in 4T1 GPD2 KO**54 **cells with or without DHA treatment. (A) Ether lipid level with or without DHA**55 **treatment in 4T1 GPD2 KO (1) cells. (B) Ether lipid level with or without DHA**56 **treatment in 4T1 GPD2 KO (2) cells.**

57 In data (A-B), the signal intensity was obtained by LC-MS and normalized by BCA

58 value. Data were obtained from three biologically independent samples. The p-value

59 was calculated by comparing the experimental group with 4T1 control group with two-

60 tailed unpaired Student's t-test. The "\*" in the graphs indicates statistically significant

61 difference ("\*":  $p < 0.05$ ; "\*\*":  $p < 0.005$ ; "\*\*\*":  $p < 0.0005$ ), and "N.S.," 'not significant.'

62 A.U., arbitrary unit

63

64

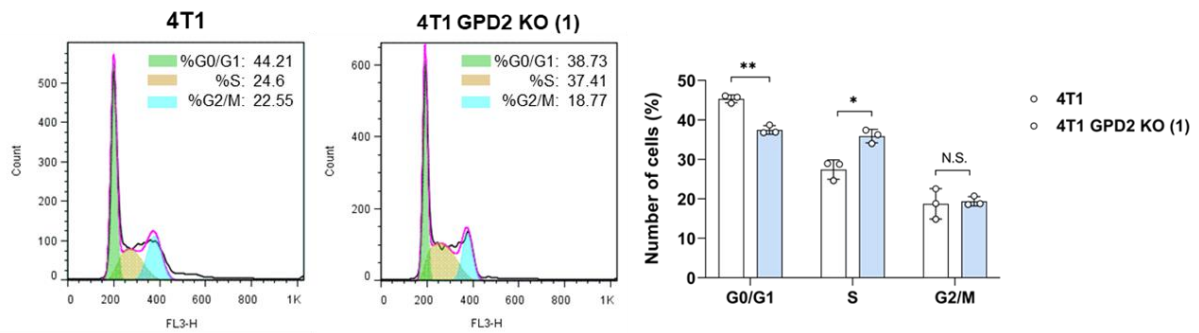

65 **Supplementary Figure 5: Representative histogram and bar graph of cell cycle**  
 66 **progression in 4T1 and 4T1 GPD2 KO cells.** Data were obtained from three  
 67 biologically independent samples. The p-value was calculated by comparing the  
 68 experimental group with 4T1 control group with two-tailed unpaired Student's t-test.  
 69 The "\*" in the graphs indicates statistically significant difference ("\*":  $p < 0.05$ ; "\*\*\*":  $p$   
 70  $< 0.005$ ; "\*\*\*\*":  $p < 0.0005$ ), and "N.S.," 'not significant.'

71

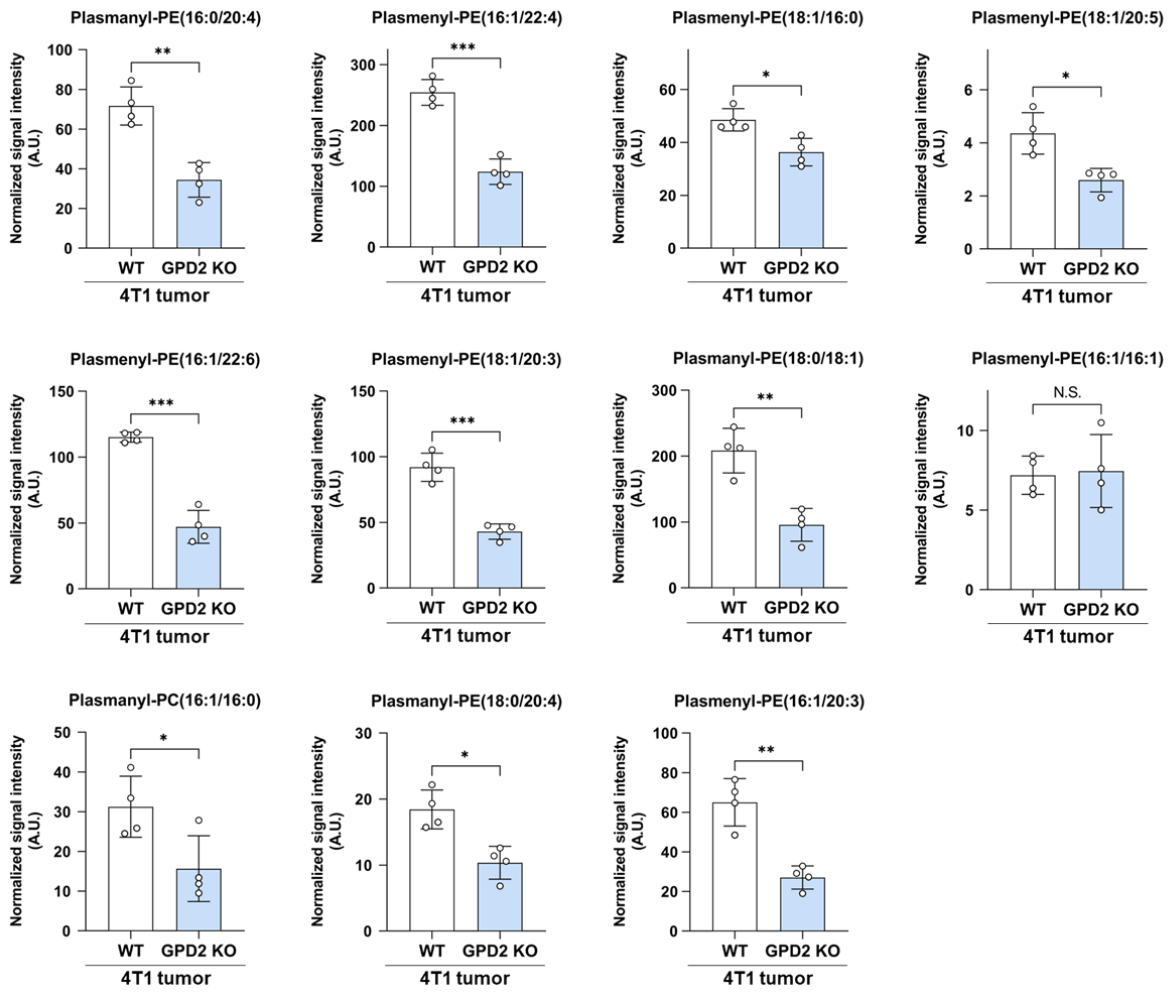

72 **Supplementary Figure 6: Levels of different ether lipid species in WT and**  
 73 **GPD2 KO of 4T1 graft tumor tissues.** The signal intensities were obtained by LC-  
 74 MS and normalized by BCA value. Data were obtained from four biologically  
 75 independent samples. The p-value was calculated by comparing the experimental  
 76 group with 4T1 control group with two-tailed unpaired Student's t-test. The "\*" in the  
 77 graphs indicates statistically significant difference ("\*":  $p < 0.05$ ; "\*\*\*":  $p < 0.005$ ; "\*\*\*\*":  
 78  $p < 0.0005$ ), and "N.S.," 'not significant.' A.U., arbitrary unit  
 79

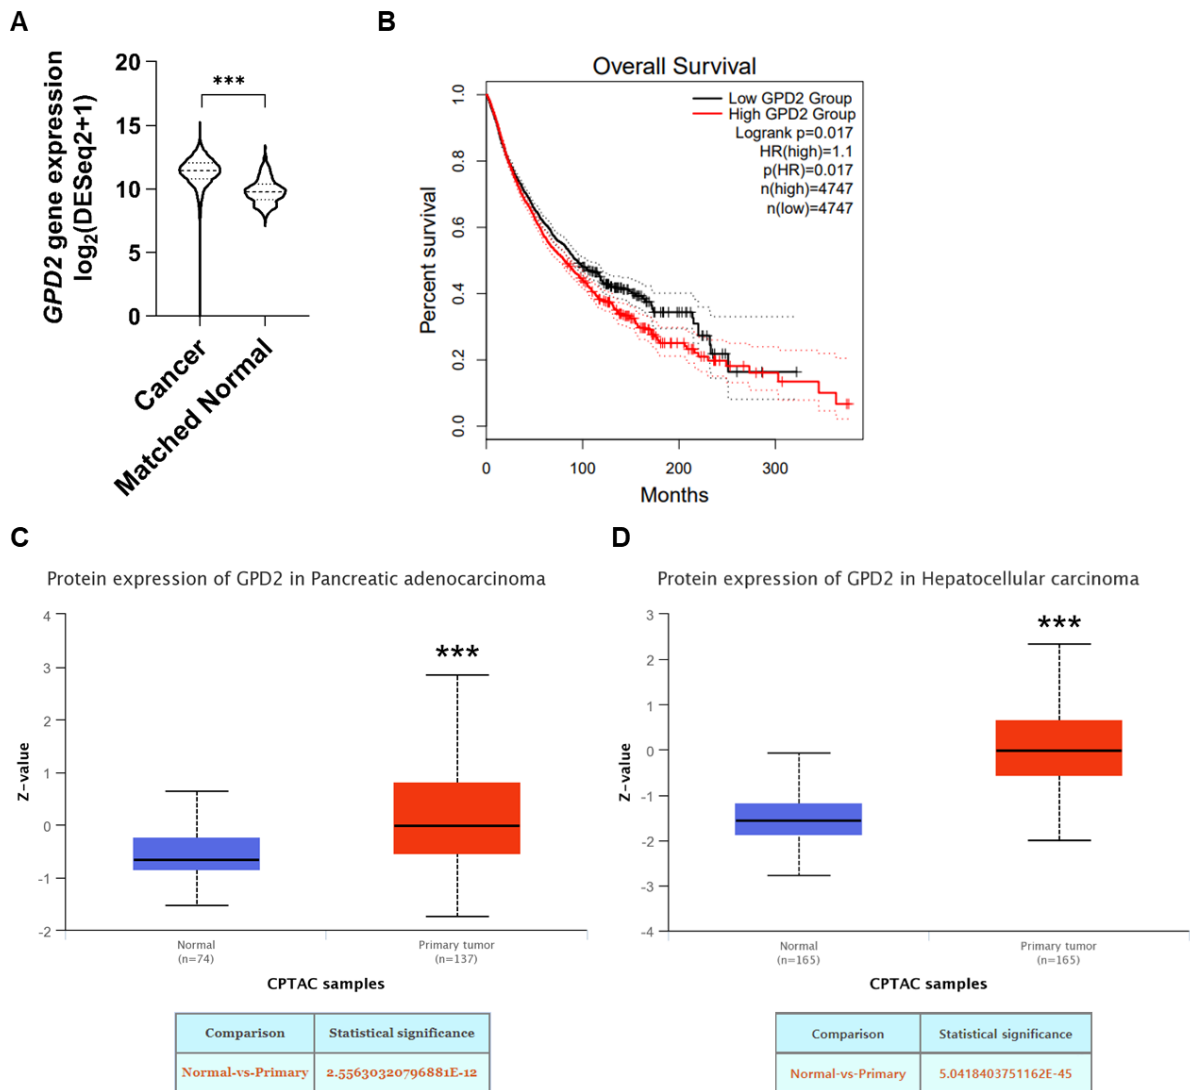

80 **Supplementary Figure 7: GPD2 expression in various types of cancer and**  
 81 **related patient survival. (A)** Comparison of *GPD2* gene expression between  
 82 samples from all cancer tissue types and their normal counterparts in Figure 6A. For  
 83 those in normal tissues, duplicate samples were excluded. **(B)** Kaplan-Meier plot  
 84 comparing overall survival of *GPD2*-high expression group (red line) and *GPD2*-low  
 85 expression group (black line) in patients for all cancer tissue types. Survival analysis  
 86 was performed in GEPIA 2 (<http://gepia2.cancer-pku.cn>) [55]. **(C-D)** *GPD2* protein  
 87 level comparison between normal and cancer tissues for pancreatic adenocarcinoma  
 88 (C) and liver cancer (D) from CPTAC proteomic database.  
 89 For data (A), the Wilcoxon rank-sum test was used to compare statistical significance  
 90 between the groups. For data (B), the log-rank test was used to compare statistical  
 91 significance between the groups. For data (C-D), the Student's t-test was used to  
 92 compare statistical significance between the groups. The “\*” in the graphs indicates  
 93 statistically significant difference (“\*”:  $p < 0.05$ ; “\*\*”:  $p < 0.005$ ; “\*\*\*”:  $p < 0.0005$ ).
